# Supplementary material for: Interfacial engineering of CuSCN-based perovskite solar cells via PMMA interlayer toward enhanced efficiency and stability
Source: Royal Society of Chemistry journal article supplement (doi:10.1039/d1nj02454j), 2021-01-01
Supplement: d1nj02454j1.pdf [file d1nj02454j1.pdf]

**Interfacial engineering of CuSCN-based perovskite solar cells *via* PMMA  
interlayer toward enhanced efficiency and stability**

*Pan Xu, Jian Liu, \* Jiahao Huang, Fan Yu, Cheng-Hui Li, You-Xuan Zheng*

[\*] Mr. P. Xu, Dr. J. Liu, Mr. J. Huang, Ms. F. Yu, Dr. C.-H. Li, Dr. Y.-X. Zheng

State Key Laboratory of Coordination Chemistry, School of Chemistry and Chemical  
Engineering, Nanjing University, Nanjing 210093, PR China

E-mail: [liu.jian@nju.edu.cn](mailto:liu.jian@nju.edu.cn)

[\*] Dr. J. Liu

College of Chemical Engineering, Nanjing Forestry University, Nanjing 210037, P. R.  
China

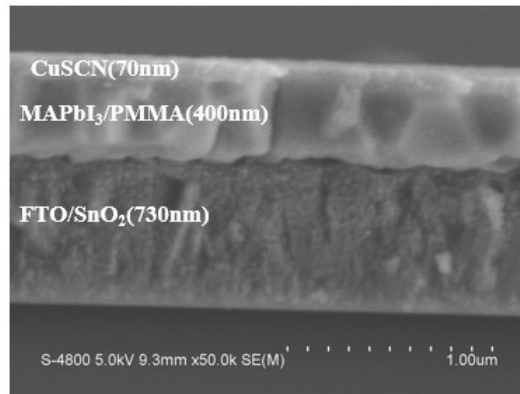

**Figure S1.** The cross-sectional SEM image of PSCs with the configuration of FTO/SnO<sub>2</sub>/MAPbI<sub>3</sub>/CuSCN.

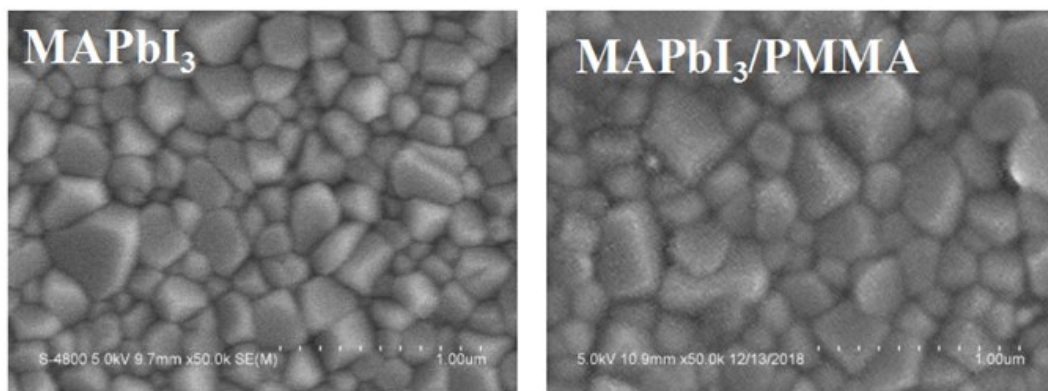

**Figure S2.** SEM images of perovskite thin films.

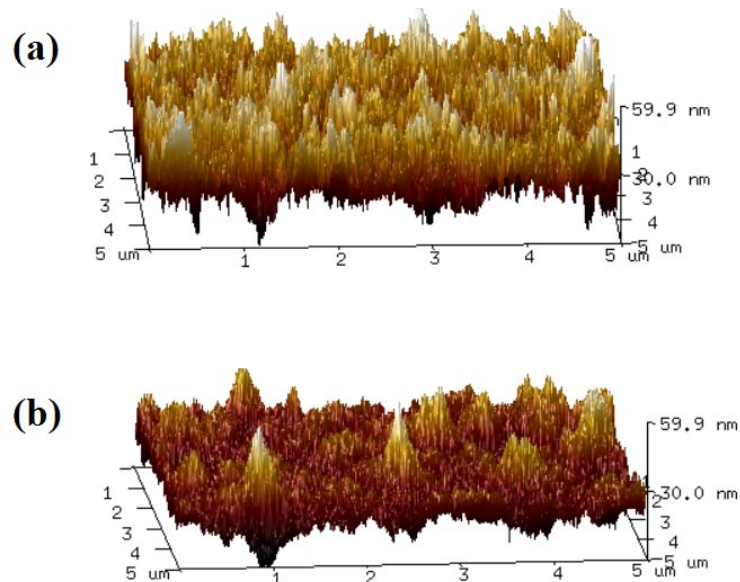

**Figure S3.** AFM topographical image of perovskite thin films. a) without PMMA; b) with PMMA.

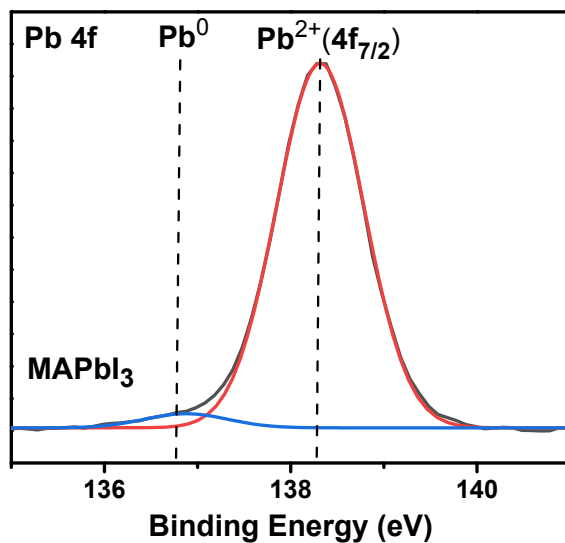

**Figure S4.** The XPS spectra of Pb 4f core level of MAPbI<sub>3</sub> thin film.

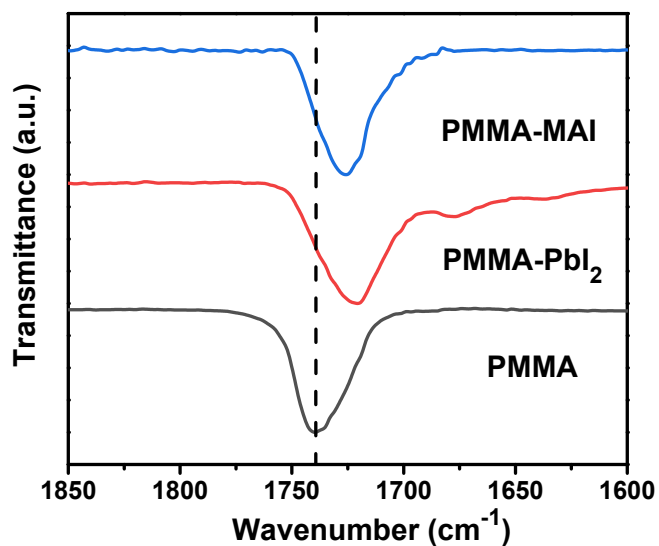

**Figure S5.** FTIR spectra of PMMA and PbI<sub>2</sub>/PMMA thin films.

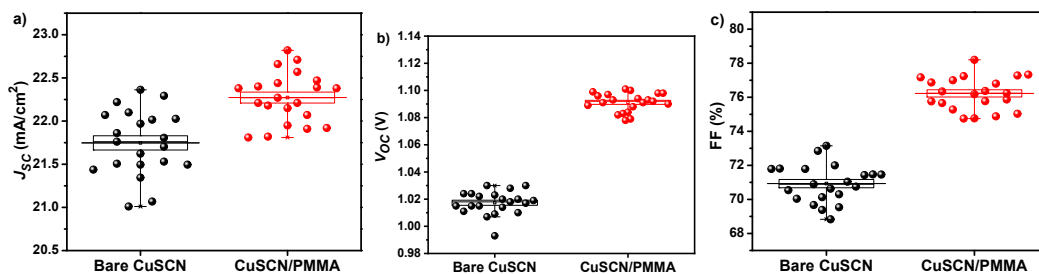

**Figure S6.** Statistics on performance variations of pristine devices and PMMA modified devices (20 cells for each). a)  $J_{sc}$ ; b)  $V_{oc}$ ; c) FF.

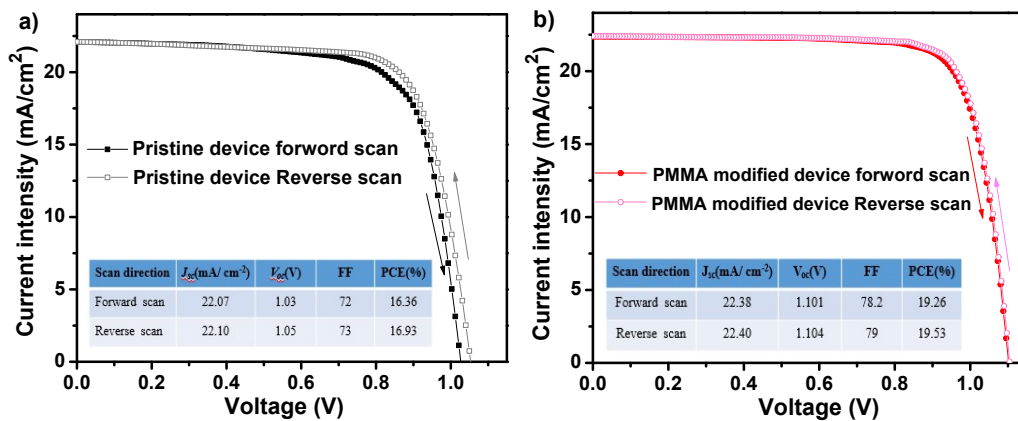

**Figure S7.** Hysteresis of the pristine device and PMMA modified device. (Inset, photovoltaic parameters extracted from the  $J$ - $V$  curves of the champion devices measured at reverse and forward scans.)

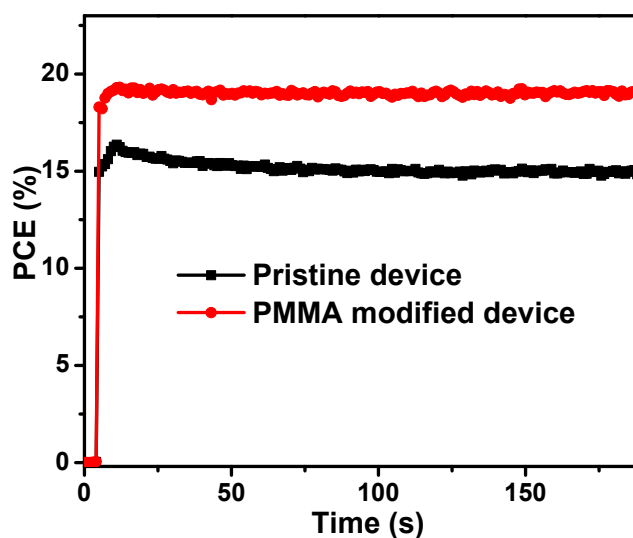

**Figure S8.** Steady photocurrent of pristine device and PMMA modified device.

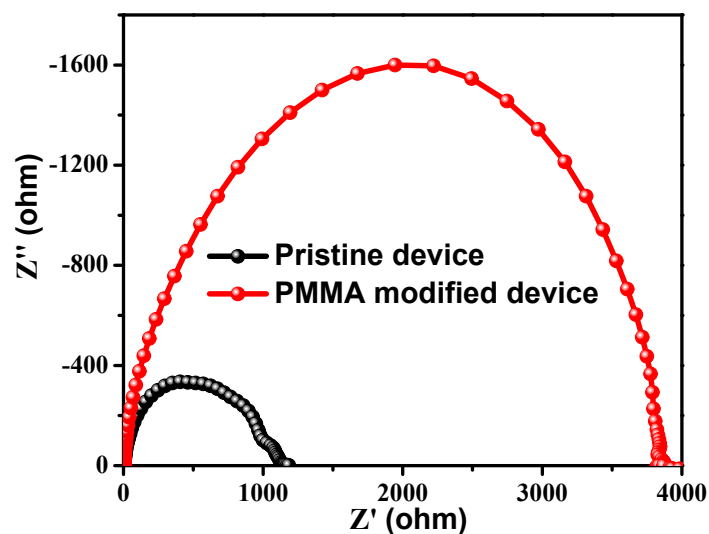

**Figure S9.** Nyquist plots of pristine device and PMMA modified device, measured under dark conditions at a bias of 0.8 V.

**Table S1** Photovoltaic parameters of PSCs with or without the PMMA layer

| device               | $J_{SC}$ (mA/cm <sup>2</sup> ) | $V_{OC}$ (V)      | FF (%)           | PCE (%)          |
|----------------------|--------------------------------|-------------------|------------------|------------------|
| Pristine device      | $21.74 \pm 0.37$               | $1.017 \pm 0.008$ | $0.709 \pm 0.01$ | $15.69 \pm 0.43$ |
| PMMA modified device | $22.27 \pm 0.29$               | $1.091 \pm 0.006$ | $0.760 \pm 0.01$ | $18.53 \pm 0.43$ |
